# Supplementary material
Source: Elsevier journal article supplement (https://addi.ehu.eus/bitstream/handle/10810/19590/mmc1.pdf)
Supplement: mmc1 [file mmc1.pdf]

## Supplementary Material

Testing the connections within face processing circuitry in Capgras delusion with diffusion imaging tractography.

Maria A. Bobes<sup>a</sup>, Daylin Góngora<sup>a</sup>, Annette Valdes<sup>b</sup>; Yusniel Santos<sup>a</sup>, Yanely Acosta<sup>a</sup>, Yuriem Fernandez-Garcia<sup>c</sup>,  
Agustin Lage<sup>a</sup>, Mitchell Valdés-Sosa<sup>a</sup>

<sup>a</sup> Cuban Center for Neuroscience, Havana, Cuba

<sup>b</sup> CENSAM, Havana, Cuba

<sup>c</sup> Basque Center on Cognition, Brain and Language (BCBL), Mikeletegui 69, 2º, 20009 Donostia, Gipuzkoa, Basque Contry, Spain.

## 1. Neuropsychological assessment

Supplementary Table S1

| Mini-Mental State                                                                     |                                       | Raw Scores           |                           |
|---------------------------------------------------------------------------------------|---------------------------------------|----------------------|---------------------------|
| Total Score (0-30)                                                                    |                                       | 23                   |                           |
| Time and place orientation subscore (0-10)                                            |                                       | 8                    |                           |
| Word registration subscore (0-3)                                                      |                                       | 3                    |                           |
| Attention subscore (0-5)                                                              |                                       | 1                    |                           |
| Word recall subscore (0-3)                                                            |                                       | 2                    |                           |
| Language subscore (naming; repetition; following commands, reading and writing) (0-8) |                                       | 8                    |                           |
| Pentagon copying subscore (0-1)                                                       |                                       | 1                    |                           |
| WAIS-R Estimated IQ                                                                   |                                       |                      |                           |
| WAIS-R Subtest (range scale)                                                          | Scaled Score Equivalents of Raw Score | Sum of scaled scores | Full Scale IQ Equivalents |
| WAIS-R Estimated Verbal IQ (0-19)                                                     | 11                                    | 17                   | 104                       |
| WAIS-R Estimated Non-verbal IQ (0-19)                                                 | 6                                     |                      |                           |
| Neuropsychological Test                                                               | Raw score                             | Equivalent score     | Cut-off score             |
| Phonetic Verbal Fluency                                                               | 1                                     | -                    | $\leq 7.09$               |
| Semantic Verbal Fluency                                                               | 4                                     | -                    | $\leq 11.13$              |
| Trial making                                                                          |                                       |                      |                           |
| Trial making A                                                                        | 141                                   | 114                  | $\geq 94$                 |
| Trial making B *                                                                      | *                                     | *                    | $\geq 283$                |
| Trial making B-A *                                                                    | NA                                    | NA                   | $\geq 187$                |
| Forward Digit Span WAIS-III                                                           | 4                                     | -                    | $\leq 4.69$               |
| Forward Spatial Span (Corsi blocks)                                                   | 4                                     | 4                    | $\leq 3.50$               |
| Attentional digit matrix task                                                         | 26                                    | 28                   | $\leq 30$                 |

\* Patient was unable to complete trial making (part B) due to cognitive impairment (reduced in alertness, attentional visual search deficits). The task could not be completed, since the patient had not finished part B of the task after five minutes, therefore part B-A was not applied (NA).

## 2. Tractography analysis.

### ROIs for tract fiber selection in the streamline tractography method

ROIs defined in previous publications were used as the basis for the tract definitions (Wakana et al., 2007).

All ROI were first manually traced on the MNI152 average brain, and then transformed to each subject's DTI native space. This was done via inverse transformations of the mappings used for: 1) Realignment of a high resolution anatomical T1 image, initially coregistered to DTI B0 image, to the standard position on the AC-PC plane; 2) Normalization (jointly with segmentation) of the T1 image to MNI space using the procedure from SPM5. Each ROI

mapped to DTI native space was then inspected visually and corrected with deletions or additions of voxels if necessary.

The inferior fronto-occipital fasciculus (IFOF) was defined as those fibers in contact with an occipital ROI, with the sagittal stratum, and with a frontal ROI, while not in contact with the temporal ROI used to define ILF (see below), nor the central grey nuclei, nor the cerebral midline. The occipital ROI was traced on the coronal slices  $-64 < y < -58$ , from the transverse parieto-occipital sulcus to the ventral border of the occipital lobe. The frontal ROI was traced at the anterior border of the insula and included all the frontal lobe. The homonymous region from a white matter parcellation map in MNI space (Mori et al., 2008) was used to create the sagittal stratum ROI, which was then dilated at the surface by 3 voxels.

The inferior longitudinal fasciculi (ILF) were defined as fibers in contact with the same occipital ROI as IFOF, with the sagittal stratum, and with a temporal ROI, while not in contact with the frontal ROI used to define IFOF (see above), nor the central grey nuclei, nor the cerebral midline. The ILF was subdivided into a dorsal and ventral tracts according to the temporal ROI that was used. For the ventral tract (vILF), the temporal ROI included the inferior and middle temporal gyri (and underlying white matter) while excluding the superior temporal gyrus, in coronal slices  $-3 < y < 3$  mm. For the dorsal tract (dILF), the temporal ROI included the superior temporal gyrus (and underlying white matter), while excluding the inferior and middle temporal gyri, also in coronal slices  $-3 < y < 3$  mm.

Other white matter association tracts were reconstructed using the protocol defined previously (Wakana et al., 2007) for the left and right hemispheres: the uncinate fasciculus (UNC), cingulum-cingulate gyrus (CGC); cingulum-hippocampal part (CGH); Cortico-spinal tract (CST); anterior thalamic radiation (ATR). Several measures were obtained from each tract: streamline count, number of intersected voxel (NIV), and the average of FA and the average of the mean diffusivity (MD) and radial diffusivity (RD) for each tract. The mean values for the controls as well as the value obtained for patient J.R. in the first and second study are displayed in the following table. The results of the statistical comparison between the patient and controls was carried out using the tests developed for single case studies (Crawford & Garthwaite, 2002), as described in the article.

#### 4- Tractography additional results

##### Supplementary Table S2

Diffusion tensor measurements values in the controls and J.R. patient. Mean values and standard deviations of streamline counts (SC), number of intersected voxel (NIV), fractional anisotropy (FA), mean diffusivity (MD) and radial diffusivity (RD) are shown. T and p-value resulted from the statistical comparison for single case studies.

|              | UNC left | UNC right | ATR left  | ATR right | CGC left | CGC right | CGH left | CGH right | CST left  | CST right |
|--------------|----------|-----------|-----------|-----------|----------|-----------|----------|-----------|-----------|-----------|
| <b>SC</b>    |          |           |           |           |          |           |          |           |           |           |
| mean         | 80,4000  | 174,2000  | 233,6000  | 191,6000  | 55,6000  | 91,9000   | 98,5000  | 98,5000   | 164,3000  | 52,3000   |
| SD           | 46,1572  | 120,3530  | 135,3097  | 113,0803  | 37,7659  | 54,2923   | 62,6724  | 62,6724   | 104,5254  | 29,7659   |
| J.R. Study 1 | 148,0000 | 288,0000  | 302,0000  | 165,0000  | 4,0000   | 52,0000   | 56,0000  | 56,0000   | 135,0000  | 77,0000   |
| T            | 1,0939   | 0,8507    | 0,6070    | 0,1072    | -2,0291  | -0,3820   | -0,7272  | -0,7272   | 0,1506    | 0,8021    |
| p            | 0,1512   | 0,2085    | 0,2794    | 0,4585    | 0,0365   | 0,3556    | 0,2428   | 0,2428    | 0,4418    | 0,2216    |
| J.R. Study 2 | 43,0000  | 36,0000   | 432,0000  | 336,0000  | 41,0000  | 103,0000  | 242,0000 | 242,0000  | 180,0000  | 11,0000   |
| T            | -0,6132  | -1,3762   | 1,0971    | 0,8953    | 0,0114   | 0,3984    | 1,8251   | 1,8251    | 0,3525    | -1,9469   |
| p            | 0,2774   | 0,1010    | 0,1505    | 0,1970    | 0,4956   | 0,3498    | 0,0506   | 0,0506    | 0,3663    | 0,0417    |
| <b>NIV</b>   |          |           |           |           |          |           |          |           |           |           |
| mean         | 321,5000 | 558,2000  | 1117,1000 | 983,0000  | 333,0000 | 406,3000  | 587,4000 | 449,3000  | 842,7000  | 440,1000  |
| SD           | 171,5454 | 309,0591  | 386,4630  | 375,6597  | 78,4219  | 211,6265  | 192,8293 | 198,9204  | 323,7304  | 150,9845  |
| J.R. Study 1 | 480,0000 | 816,0000  | 1392,0000 | 1043,0000 | 61,0000  | 343,0000  | 342,0000 | 250,0000  | 927,0000  | 684,0000  |
| T            | 0,8030   | 0,7736    | 0,7100    | 0,2877    | -3,3384  | -0,0494   | -1,5196  | -1,1798   | 0,3213    | 1,1609    |
| p            | 0,2213   | 0,2295    | 0,2479    | 0,3901    | 0,0043   | 0,4808    | 0,0815   | 0,1342    | 0,3777    | 0,1378    |
| J.R. Study 2 | 580,0000 | 739,0000  | 626,0000  | 276,0000  | 85,0000  | 121,0000  | 240,0000 | 231,0000  | 1541,0000 | 1282,0000 |
| T            | 1,0720   | 0,6360    | -1,3216   | -2,3025   | -2,6384  | -1,7571   | -2,6024  | -1,3630   | 1,0018    | 2,5952    |
| p            | 0,1558   | 0,2703    | 0,1094    | 0,0234    | 0,0135   | 0,0564    | 0,0143   | 0,1030    | 0,1713    | 0,0145    |
| <b>AF</b>    |          |           |           |           |          |           |          |           |           |           |
| mean         | 0,28724  | 0,29314   | 0,34965   | 0,34865   | 0,35642  | 0,33260   | 0,32839  | 0,29066   | 0,42536   | 0,43205   |
| SD           | 0,03546  | 0,03156   | 0,03111   | 0,02513   | 0,03863  | 0,03238   | 0,03105  | 0,03317   | 0,03341   | 0,02350   |
| J.R. Study 1 | 0,27508  | 0,28709   | 0,33159   | 0,37664   | 0,31879  | 0,33132   | 0,27400  | 0,27371   | 0,41104   | 0,41350   |
| T            | -0,32709 | -0,18268  | -0,55338  | 1,06199   | -0,93734 | -0,03771  | -1,67000 | -0,48730  | -0,40867  | -0,75291  |
| p            | 0,37554  | 0,42955   | 0,29674   | 0,15795   | 0,18653  | 0,48537   | 0,06463  | 0,31885   | 0,34617   | 0,23537   |
| J.R. Study 2 | 0,27828  | 0,28347   | 0,31396   | 0,36028   | 0,33498  | 0,28449   | 0,31241  | 0,26558   | 0,39527   | 0,41344   |
| T            | -0,24109 | -0,29226  | -1,09375  | 0,44133   | -0,53879 | -1,41675  | -0,49067 | -0,72104  | -0,85875  | -0,75535  |
| p            | 0,40744  | 0,38836   | 0,15124   | 0,33469   | 0,30155  | 0,09511   | 0,31770  | 0,24460   | 0,20638   | 0,23467   |
| <b>MD</b>    |          |           |           |           |          |           |          |           |           |           |
| mean         | 0,00085  | 0,00086   | 0,00082   | 0,00082   | 0,00079  | 0,00077   | 0,00094  | 0,00098   | 0,00079   | 0,00080   |
| SD           | 0,00006  | 0,00007   | 0,00005   | 0,00004   | 0,00006  | 0,00005   | 0,00005  | 0,00006   | 0,00004   | 0,00004   |
| J.R. Study 1 | 0,00083  | 0,00082   | 0,00078   | 0,00078   | 0,00078  | 0,00072   | 0,00096  | 0,00093   | 0,00083   | 0,00079   |
| T            | -0,36189 | -0,63507  | -0,70712  | -0,89909  | -0,00528 | -0,98252  | 0,42020  | -0,87494  | 0,95214   | -0,18191  |
| p            | 0,36289  | 0,27060   | 0,24870   | 0,19601   | 0,49795  | 0,17576   | 0,34210  | 0,20218   | 0,18295   | 0,42984   |
| J.R. Study 2 | 0,00083  | 0,00084   | 0,00082   | 0,00081   | 0,00073  | 0,00081   | 0,00094  | 0,00097   | 0,00080   | 0,00082   |
| T            | -0,30406 | -0,23908  | 0,04852   | -0,28812  | -0,86353 | 0,75111   | -0,06560 | -0,19631  | 0,15958   | 0,48442   |

|              |          |          |          |          |          |          |          |          |          |          |
|--------------|----------|----------|----------|----------|----------|----------|----------|----------|----------|----------|
| p            | 0,38400  | 0,40820  | 0,48118  | 0,38989  | 0,20514  | 0,23588  | 0,47457  | 0,42436  | 0,43837  | 0,31983  |
| <b>RD</b>    |          |          |          |          |          |          |          |          |          |          |
| mean         | 0,00111  | 0,00113  | 0,00113  | 0,00114  | 0,00110  | 0,00106  | 0,00127  | 0,00128  | 0,00118  | 0,00121  |
| SD           | 0,00007  | 0,00008  | 0,00005  | 0,00004  | 0,00008  | 0,00006  | 0,00006  | 0,00007  | 0,00006  | 0,00006  |
| J.R. Study 1 | 0,00108  | 0,00107  | 0,00107  | 0,00112  | 0,00105  | 0,00098  | 0,00123  | 0,00119  | 0,00122  | 0,00117  |
| T            | -0,51039 | -0,75646 | -1,32787 | -0,43310 | -0,59968 | -1,26481 | -0,55398 | -1,31355 | 0,61906  | -0,58818 |
| p            | 0,31103  | 0,23435  | 0,10846  | 0,33757  | 0,22843  | 0,11885  | 0,29654  | 0,11075  | 0,27561  | 0,28544  |
| J.R. Study 2 | 0,00109  | 0,00110  | 0,00110  | 0,00113  | 0,00100  | 0,00106  | 0,00123  | 0,00123  | 0,00116  | 0,00122  |
| T            | -0,36430 | -0,36181 | -0,59860 | -0,17308 | -1,21634 | -0,00359 | -0,61584 | -0,74546 | -0,45663 | 0,14556  |
| p            | 0,36202  | 0,36292  | 0,28210  | 0,43321  | 0,26461  | 0,49861  | 0,27663  | 0,23751  | 0,32938  | 0,44374  |

No p-values survived the Bonferroni criterion of  $p < 0.00125$ .

## References

- Alegret, M., Espinosa, A., Vinyes-Junqué, G., Valero, S., Hernández, I., Tárraga, L., ... & Boada, M. (2012). Normative data of a brief neuropsychological battery for Spanish individuals older than 49. *Journal of clinical and experimental neuropsychology*, 34(2), 209-219.
- Folstein MF, Folstein SE, McHugh PR (1975): "Mini-mental state". A practical method for grading the cognitive state of patients for the clinician. *J Psychiatr Res* 12:189-198.
- Giovagnoli AR, Del PM, Mascheroni S, Simoncelli M, Laiacona M, Capitani E. Trail making test: normative values from 287 normal adult controls. *Ital J Neurol Sci* 1996;17(4):305-309.
- Silverstein, A. B. (1982). Two-and four-subtest short forms of the Wechsler Adult Intelligence Scale-Revised. *Journal of Consulting and Clinical Psychology*, 50, 415-418.
- Spinnler, H., & Tognoni, G. (1987). Italian Group on the Neuropsychological Study of Ageing: Italian standardization and classification of neuropsychological tests. *Ital J Neurol Sci*, 6(suppl 8), 1-120.
- Wechsler, D. (1997). *WAIS-III. Wechsler Adult Intelligence Scale-Third Edition. Technical manual*. San Antonio, TX: The Psychological Corporation.
